# Supplementary material for: Cerebellar Involvement in Patients with Mild to Moderate Myoclonus Due to EPM1: Structural and Functional MRI Findings in Comparison with Healthy Controls and Ataxic Patients
Source: Springer Nature journal article supplement (doi:10.1007/s10548-016-0534-y), 2016-10-26
Supplement: MOESM3 [file 10990958]

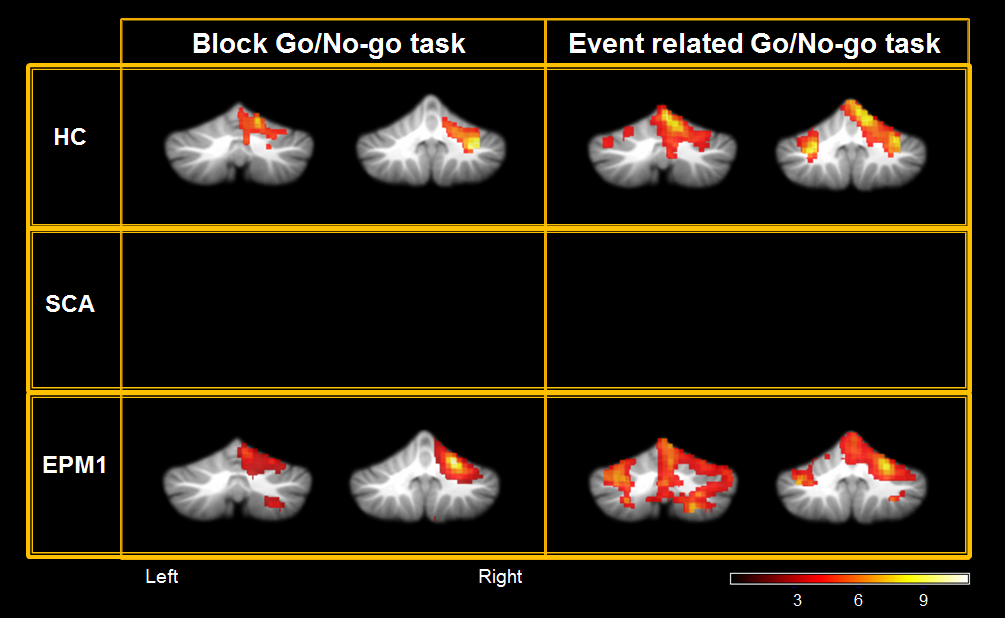


Supplementary Figure 1: Second-level fMRI group analysis in SUIT during the block (left panel) and event-related (right panel) go/no-go task. The activations were reported with a FDR corrected voxel-level threshold of p <0.01. SUIT coordinates: y = - 64, y = - 54 for both task.
